# Supplementary material for: One-step noninvasive prenatal testing (NIPT) for autosomal recessive homozygous point mutations using digital PCR
Source: PubMed Central journal article supplement (PMC5811538; doi:10.1038/s41598-018-21236-w), 2018-02-13
Supplement: 41598_2018_21236_MOESM1_ESM.pdf [file 41598_2018_21236_MOESM1_ESM.pdf]

## Supplementary Information

### **One-step noninvasive prenatal testing (NIPT) for autosomal recessive homozygous point mutations using digital PCR**

Mun Young Chang,<sup>1\*</sup> Soyeon Ahn,<sup>2\*</sup> Min Young Kim<sup>3</sup>, Jin Hee Han<sup>3</sup>, Hye-Rim Park<sup>3</sup>, Han Kyu Seo<sup>4</sup>, Jinsun Yoon<sup>5</sup>, Seungmin Lee<sup>3</sup>, Doo-Yi Oh<sup>3</sup>, Changsoo Kang<sup>6</sup> & Byung Yoon Choi<sup>3,7</sup>

<sup>1</sup>Department of Otorhinolaryngology-Head and Neck Surgery, Chung-Ang University College of Medicine, 102 Heukseok-ro, Dongjak-gu, Seoul, 06973, Republic of Korea.

<sup>2</sup>Medical Research Collaborating Center, Seoul National University Bundang Hospital, 82 Gumi-ro 173 beon-gil, Bundang-gu, Seongnam, 13620, Republic of Korea.

<sup>3</sup>Department of Otorhinolaryngology, Seoul National University Bundang Hospital, 82 Gumi-ro 173 beon-gil, Bundang-gu, Seongnam, 13620, Republic of Korea.

<sup>4</sup>LAS Inc., 16 Arayuk-ro, Gimpo, 10136, Republic of Korea.

<sup>5</sup>Bio-Medical Science Co., Ltd., BMS Bldg., 22 Yeoksam-ro 7-gil, Gangnam-gu, Seoul 06244, Republic of Korea.

<sup>6</sup>Department of Biology and Research Institute of Basic Sciences, College of Natural Sciences, Sungshin Women's University, Dongseon-dong 3-ga, Seongbuk-gu, Seoul, 01133, Republic of Korea.

<sup>7</sup>Wide River Institute of Immunology, Seoul National University College of Medicine, 101 Dabyeonbat-gil, Hwachon-myeon, Hongcheon, 25159, Republic of Korea.

Correspondence to : Byung Yoon, Choi, MD, PhD

Department of Otorhinolaryngology, Seoul National University Bundang Hospital, 82 Gumi-ro 173 beon-gil, Bundang-gu, Seongnam 13620, Korea, Tel: +82-31-787-7406; Fax: +82-31-787-4057

**Supplementary Table S1.** The sequences and concentrations of primers and probes in picodroplet digital PCR.

| Name               | Sequence(5' to 3')         | Conc. Used for RainDrop( $\mu$ M) | Anneal Temp. |
|--------------------|----------------------------|-----------------------------------|--------------|
| c.235delC-F        | CCATCTCCCACATCCGGC         | 0.35                              | 60           |
| c.235delC-R        | CACGTGCATGGCCACTAG         | 0.35                              |              |
| c.235deC-WT Probe  | VIC-AGCTGCAGGGCCCAT-NFQ    | 0.2                               |              |
| c.235delC-MT probe | FAM-ATCAGCTGCAGGGCCCAT-NFQ | 0.2                               |              |

Conc, concentration; Temp, temperature.

**Supplementary Table S2.** The protocol of polymerase chain reaction in picodroplet digital PCR.

| Step                  | Temp                 | Time   | Cycles |
|-----------------------|----------------------|--------|--------|
| Polymerase activation | 95 °C                | 10 min | 1      |
| Denaturation          | 95 °C                | 15 sec | 45     |
| Annealing & Extension | *Depending on target | 1 min  | 45     |
| Incubation            | 98 °C                | 10 min | 1      |
| Final Hold            | 12 °C                | Hold   |        |

\* A slow ramping speed (0.5°C) was used during cooling from the denaturation step to the annealing step.

Temp, temperature.

**Supplementary Table S3.** The sequences and concentrations of primers and probes in chip-based dPCR.

| Name                            | Sequence(5' to 3')                    | Conc. Used<br>for<br>QX200 (uM) | Anneal<br>Temp. |
|---------------------------------|---------------------------------------|---------------------------------|-----------------|
| SLC26A4_IVS7-2A>G -F            | TTGACAAACAAGGAATTATTTAAAACCAATG<br>GA | 0.35                            |                 |
| SLC26A4_IVS7-2A>G -R            | TCCAGGTTGGCTCCATATGAAATG              | 0.35                            | 62              |
| SLC26A4_IVS7-2A>G -<br>WT Probe | VIC-CAATTATCGTCTGAAATAA-NFQ           | 0.2                             |                 |
| SLC26A4_IVS7-2A>G -<br>MT probe | FAM-ATCGTCCGAAATAA-NFQ                | 0.2                             |                 |

**Supplementary Table S4.** The protocol of polymerase chain reaction in chip-based dPCR.

| Step                  | Temp  | Time   | Cycles |
|-----------------------|-------|--------|--------|
| Enzyme activation     | 95 °C | 10 min | 1      |
| Denaturation          | 94 °C | 30 sec | 40     |
| Annealing / Extension | 62 °C | 1 min  |        |
| Enzyme deactivation   | 98 °C | 10 min | 1      |
| Cool down and storage | 4 °C  | Hold   | 1      |

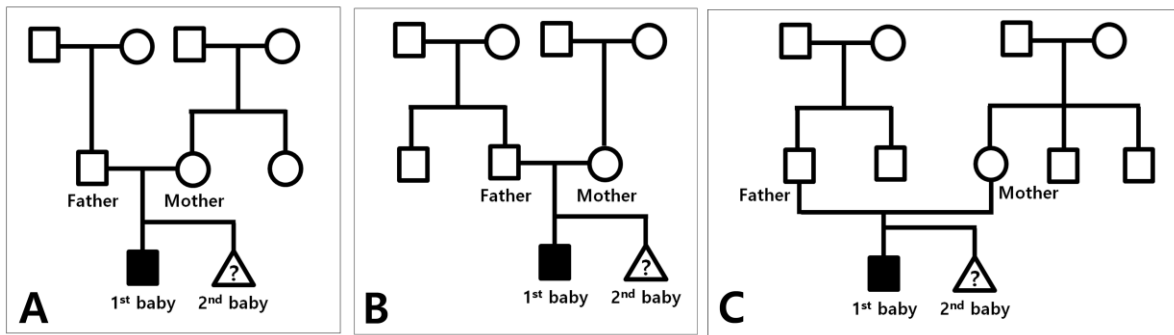

**Supplementary Figure S1.** Pedigree of three families. (A) Sanger sequencing traces of SH197 family. Father: *GJB2* c.235delC carrier, Mother: *GJB2* c.235delC carrier, the first baby: *GJB2* c.235delC homozygote. (B) Sanger sequencing traces of SB275 family. Father: *GJB2* c.235delC carrier, Mother: *GJB2* c.235delC carrier, the first baby: *GJB2* c.235delC homozygote. (C) Sanger sequencing traces of SH162 family. Father: *SLC26A4* IVS7-2A>G carrier, Mother: *SLC26A4* IVS7-2A>G carrier, the first baby: *SLC26A4* IVS7-2A>G homozygote.

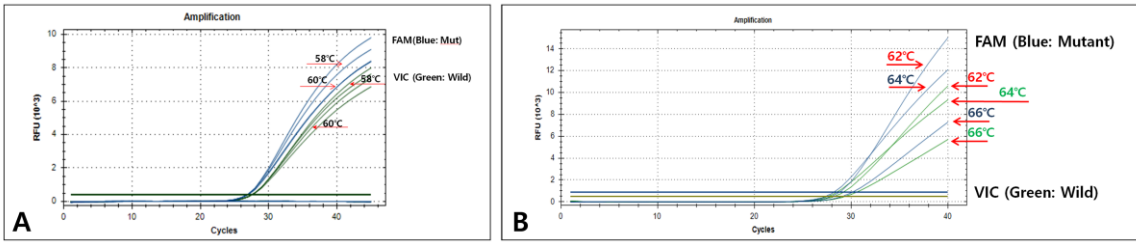

**Supplementary Figure S2.** Validation of probes. The target was detected after less than 40 cycles. (A) The probe for mutation in SH197 and SB275 families (*GJB2* c.235delC), (B) The probe for mutation in SH162 family (*SLC26A4* c.2168A>G).

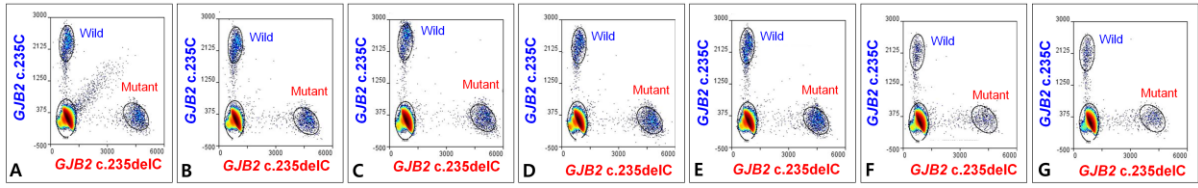

**Supplementary Figure S3.** Two-dimensional histogram of the mutation (*GJB2* c.235delC) in wildtype (A,B), heterozygote (C) and homozygote (D,E) controls and maternal plasma DNA (F,G) of SB275 family.

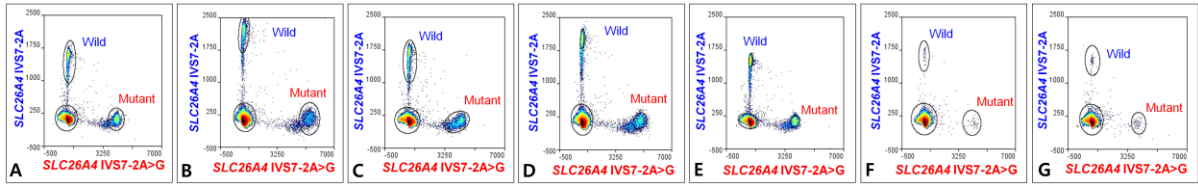

**Supplementary Figure S4.** Two-dimensional histogram of the mutation (*SLC26A4* IVS7-2A>G) in wildtype (A,B), heterozygote (C) and homozygote (D,E) controls and maternal plasma DNA (F,G) of SH162 family using picodroplet digital PCR (1st trial).

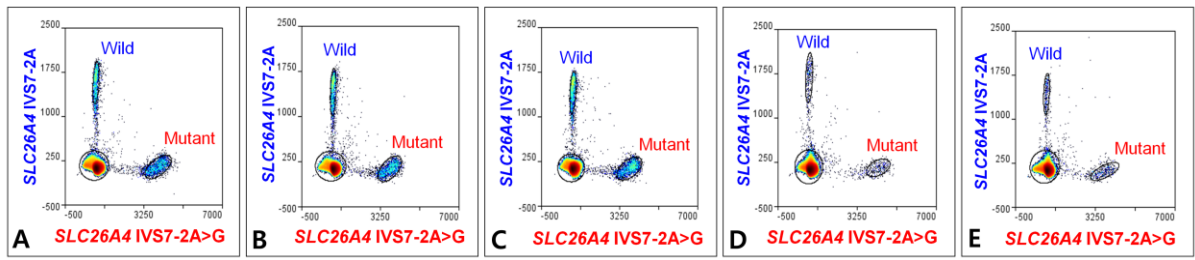

**Supplementary Figure S5.** Two-dimensional histogram of the mutation (*SLC26A4* IVS7-2A>G) in wildtype (A), heterozygote (B,C) controls and maternal plasma DNA (D,E) of SH162 family using picodroplet digital PCR (2nd trial).



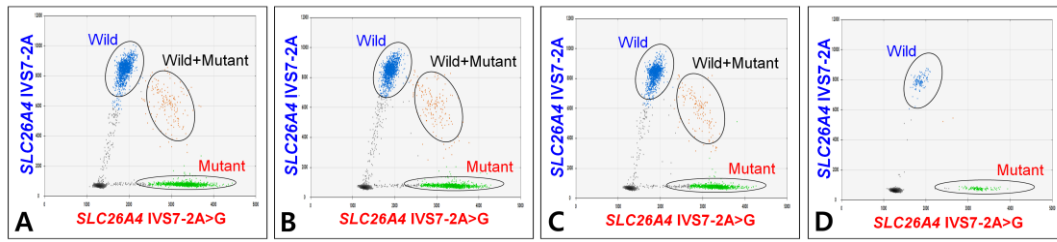

**Supplementary Figure S6.** Two-dimensional histogram of the mutation (*SLC26A4* IVS7-2A>G) in wildtype (A), heterozygote (B,C) controls and maternal plasma DNA (D) of SH162 family using chip-based dPCR (1st trial).

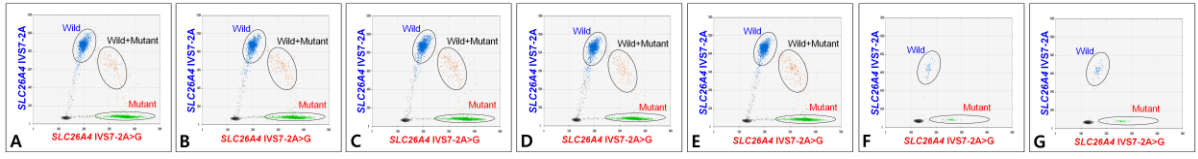

**Supplementary Figure S7.** Two-dimensional histogram of the mutation (*SLC26A4* IVS7-2A>G) in wildtype (A,B), heterozygote (C) and homozygote (D,E) controls and maternal plasma DNA (F,G) of SH162 family using chip-based dPCR (2nd trial).
